# Supplementary material
Source: PubMed Central journal article supplement (PMC2904693)

**Suppl. Fig. 1.** 8-wk-old GF K/BxN mice were shipped to the Boston SPF facility and their sera collected. Titers of anti-GPI autoAbs of the isotypes indicated were measured by ELISA. Closed triangles: values for individual SPF-housed K/BxN mice. Open circles: values for individual GF K/BxN mice.

**Suppl. Fig. 2. Effect of GF environment on K/BxN lymphocyte compartments.**

Splenocytes (A-C) or thymocytes (D-F) of GF or SPF BxN or K/BxN mice were isolated, stained with mAbs recognizing the indicated markers, and analyzed by flow cytometry. Pregated as delineated. Values indicate the % of cells in the indicated gate in whole spleen (A,B,C,E,F) or thymus (D). In panel B: mature B cells =  $\text{IgD}^{\text{hi}}\text{IgM}^{\text{lo}}$ , transitional type 1 (T1) B cells =  $\text{IgD}^{\text{lo}}\text{IgM}^{\text{hi}}$ , transitional type 2 (T2) B cells =  $\text{IgD}^{\text{hi}}\text{IgM}^{\text{hi}}$ . For panel F, B cells =  $\text{CD21}^+\text{CD23}^+$  and marginal zone B cells =  $\text{CD21}^{\text{hi}}\text{CD23}^{\text{lo}}$ . (G) Responder T cells from SPF K/BxN mice were cultured alone or in the presence of GF or SPF Tregs at various ratio (shown as responder:Treg). Each symbol represents the percent of proliferation, which was calculated by dividing the cpm values of co-cultured cells (responder + suppressor) by the cpm values of responder cells cultured alone (Stim.). Data combined from two independent experiments.

**Suppl. Fig. 3.** Ankle thickening was measured on SPF-housed K/BxN mice carrying the *Ifng*-null mutation in homozygous or heterozygous state, bi-weekly from weaning to 8 wks of age.

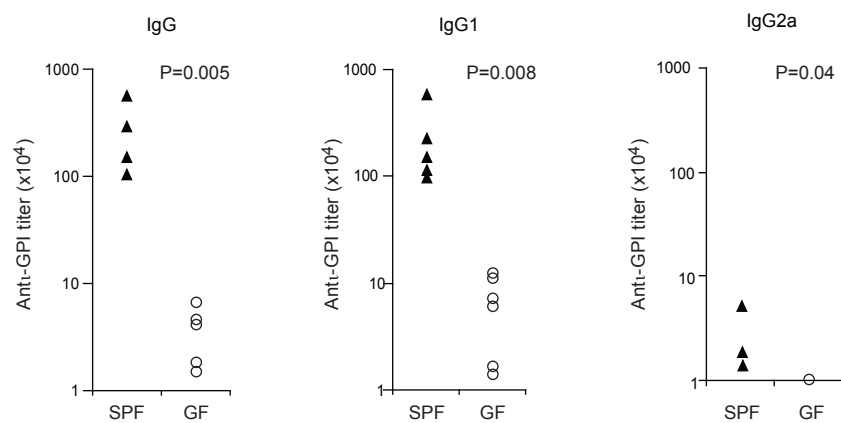

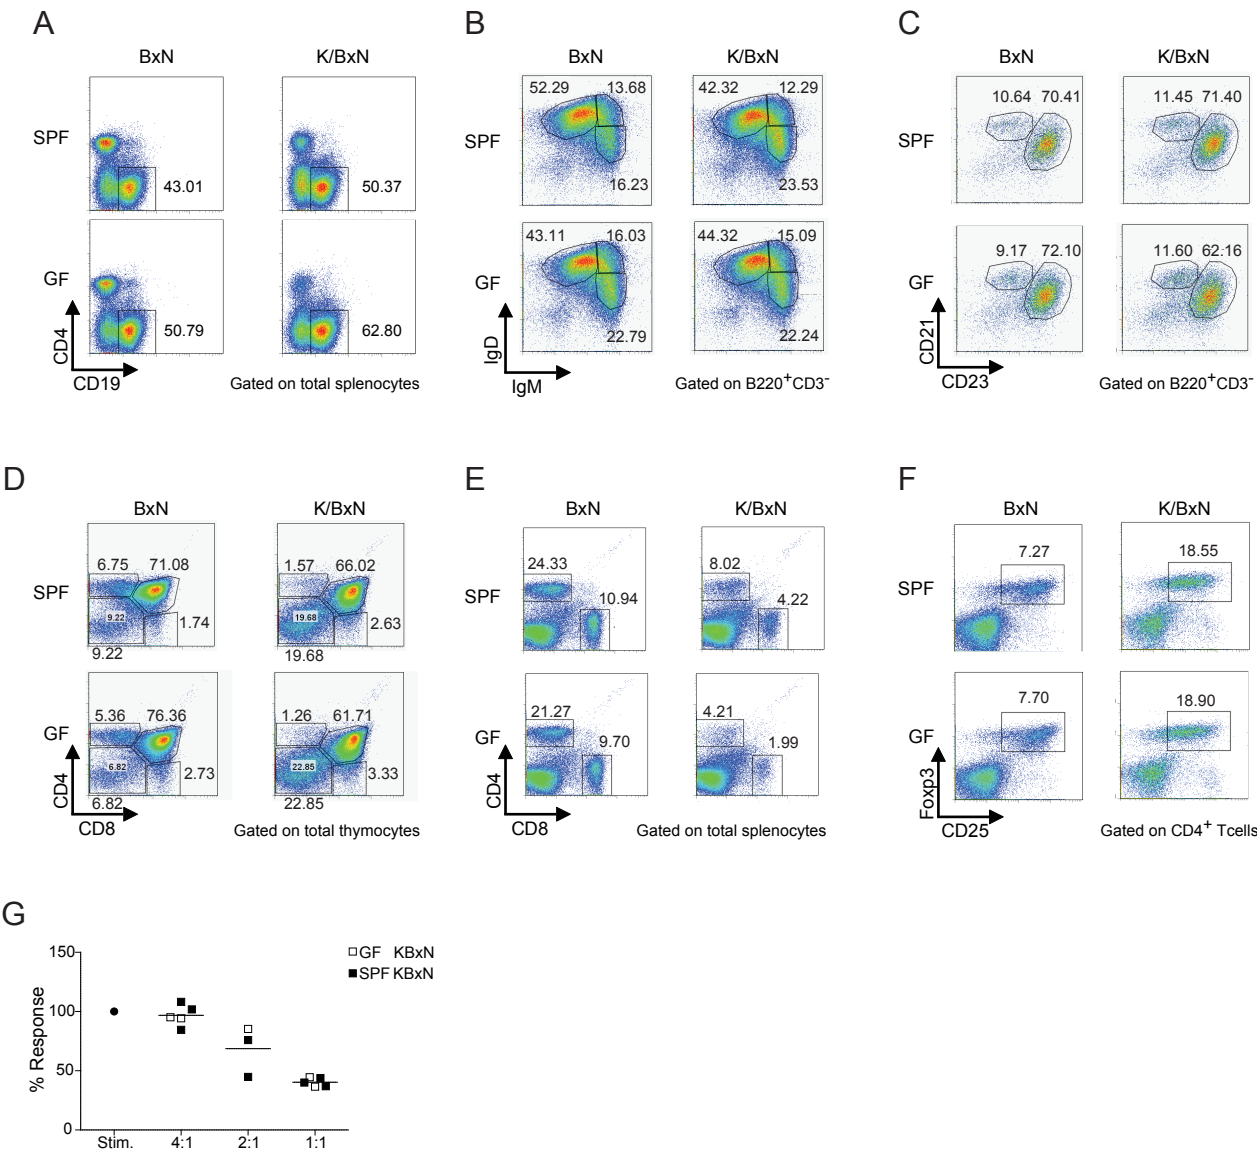

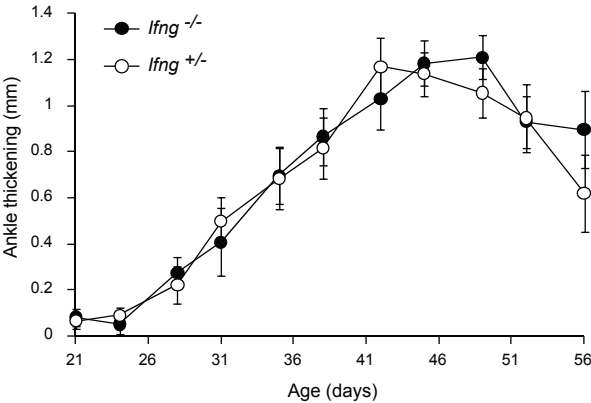

Supplement: NIHMS216502-supplement-01.pdf [file NIHMS216502-supplement-01.pdf]
